# Supplementary material
Source: PubMed Central journal article supplement (PMC9772413)
Supplement: 41467_2022_35265_MOESM3_ESM.pdf [file 41467_2022_35265_MOESM3_ESM.pdf]

**Title:** Supplementary Movie 1

**Description:** Revolving three-dimensional image of phase diagram of EGFP-tagged FUS<sup>G156E</sup> vs. PEG 6000 vs. 1,6-HD concentration. N = 3904 droplets.
